# Supplementary material for: Cu4{CH3C(OH)(PO3 )2}2(C4H4N2)(H2O)4: a novel, three-dimensional copper diphosphonate with metamagnetismElectronic supplementary information (ESI) available: views of structure 1, temperature dependence of ac magnetic susceptibility and field dependence of magnetization of 1. See http://www.rsc.org/suppdata/cc/b1/b106780j/
Source: Royal Society of Chemistry journal article supplement (doi:10.1039/b106780j), 2001-10-26
Supplement: b106780j.doc [file b106780j.doc]

## Supplementary Materials

## Cu4{CH3C(OH)(PO3)2}2(C4H4N2)(H2O)4: a novel three dimensional copper diphosphonate with metamagnetism

Ping Yin,a Li-Min Zheng,a,* Song Gao,b Xin-Quan Xina

**Fig. S1** Building unit of structure **1.**

**Fig. S2** Structure **1** viewed along c-axis.

**Fig. S3** Structure **1** viewed along b-axis.

**Fig. S4** Temperature dependence of *ac* magnetic susceptibility of **1.**

**Fig. S5** Field dependence of magnetization of **1** measured at 1.93 K.

Fig. S1

###### Fig. S2

##### Fig. S3

##### Fig. S4

##### Fig. S5
